# Supplementary material
Source: PubMed Central journal article supplement (PMC3491904)

# A PX DNA Triangle Oligomerized Using a Novel Three-Domain Motif

Wenyan Liu, Xing Wang, Tong Wang, Ruojie Sha and Nadrian C. Seeman\*

## SUPPLEMENTARY MATERIAL

This supplementary material consists of the sequences of the molecules that were used in this study.

**Sequence of the Triangle Used in the Characterization of the Molecule in Figures 2 and 3.**

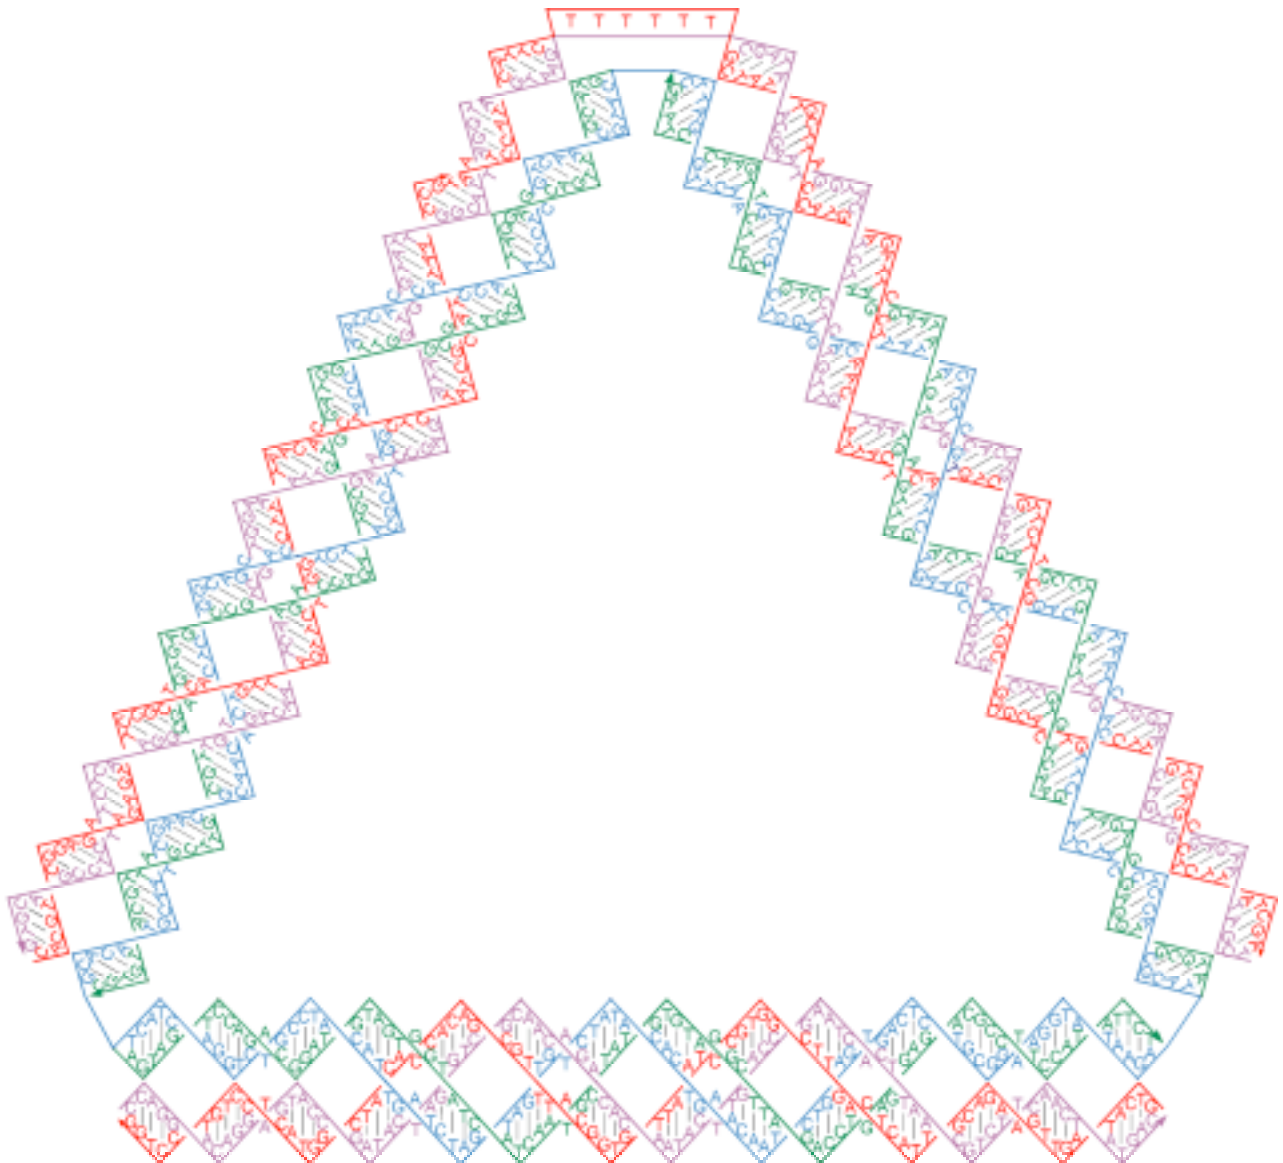

Sequence of the PATX Motif Used to Produce the 2D Array in Figure 4b.

PATX-2D

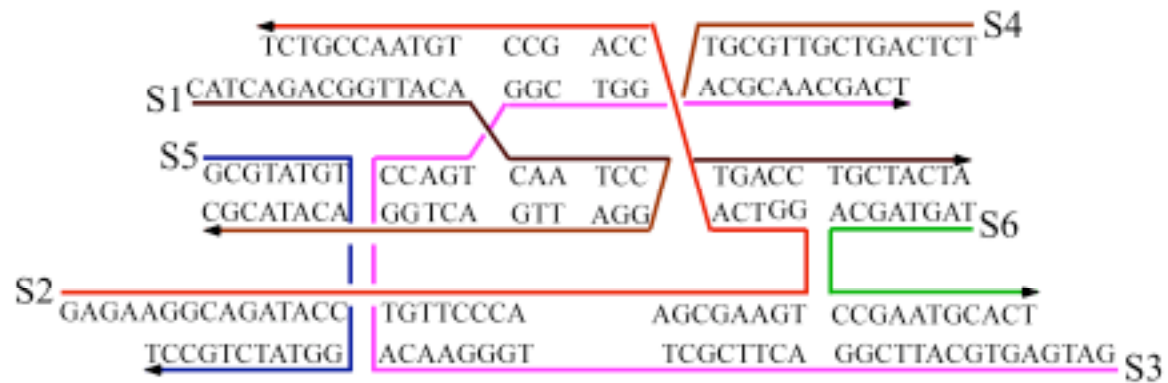

Sequences of the PX-Triangle and the PATX Motif Used to Produce the 1D Array in Figure 4c.

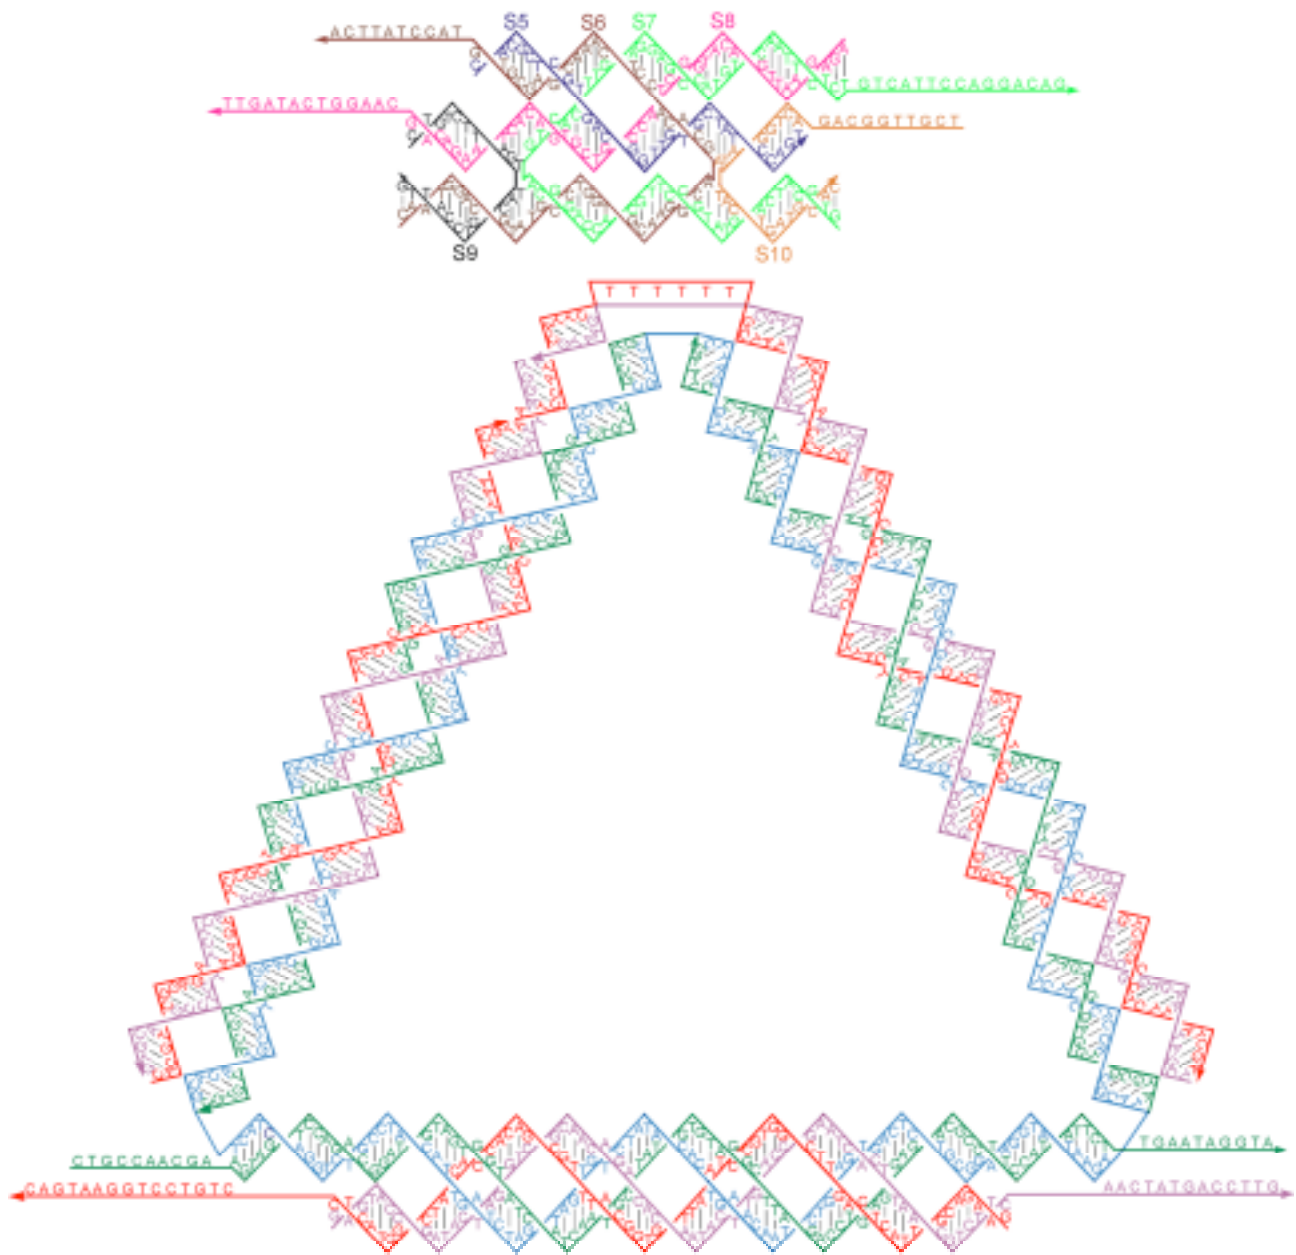

Supplement: NIHMS409103-supplement-supp.pdf [file NIHMS409103-supplement-supp.pdf]
